# Supplementary material for: Identification and Characterization of Wall-Associated Kinase (WAK) and WAK-like (WAKL) Gene Family in Juglans regia and Its Wild Related Species Juglans mandshurica
Source: MDPI journal article supplement (doi:10.3390/genes13010134), 2022-01-12
Supplement: s1 [file s1]

**Table S2 Number of exon of WAK/WAKL genes in *Juglans regia* and *J. mandshurica*.**

| Gene name | Number of exons |
|-----------|-----------------|
| JrWAK1    | 2               |
| JrWAK2    | 4               |
| JrWAK3    | 4               |
| JrWAK4    | 3               |
| JrWAK5    | 5               |
| JrWAK6    | 5               |
| JrWAK7    | 5               |
| JrWAK8    | 3               |
| JrWAK9    | 4               |
| JrWAK10   | 3               |
| JrWAK11   | 3               |
| JrWAKL1   | 4               |
| JrWAKL2   | 3               |
| JrWAKL3   | 3               |
| JrWAKL4   | 2               |
| JrWAKL5   | 5               |
| JrWAKL6   | 4               |
| JrWAKL7   | 2               |
| JrWAKL8   | 3               |

---

|          |    |
|----------|----|
| JrWAKL9  | 2  |
| JrWAKL10 | 3  |
| JrWAKL11 | 3  |
| JrWAKL12 | 4  |
| JrWAKL13 | 2  |
| JrWAKL14 | 3  |
| JrWAKL15 | 4  |
| JrWAKL16 | 4  |
| JmWAK1   | 4  |
| JmWAK2   | 3  |
| JmWAK3   | 8  |
| JmWAK4   | 4  |
| JmWAK5   | 4  |
| JmWAKL1  | 3  |
| JmWAKL2  | 3  |
| JmWAKL3  | 11 |
| JmWAKL4  | 8  |
| JmWAKL5  | 5  |
| JmWAKL6  | 5  |
| JmWAKL7  | 5  |
| JmWAKL8  | 6  |
| JmWAKL9  | 7  |

---
