# Supplementary material for: Identification and Characterization of Wall-Associated Kinase (WAK) and WAK-like (WAKL) Gene Family in Juglans regia and Its Wild Related Species Juglans mandshurica
Source: MDPI journal article supplement (doi:10.3390/genes13010134), 2022-01-12
Supplement: s1 [file s1]

**Table S3** Estimated Ka/Ks ratios of duplicated WAK/WAKL gene pairs in *Juglans regia* and *J. mandshurica*.

| Homologous gene pairs |     |              | Ks       | Ka       | Ka/Ks    |
|-----------------------|-----|--------------|----------|----------|----------|
| Jma000010712          | vs. | LOC109020209 | 0.192936 | 0.386669 | 0.498969 |
| Jma000010718          | vs. | LOC108981954 | 0.244193 | 0.764108 | 0.319579 |
| Jma000027379          | vs. | LOC108991622 | 0.079230 | 0.101024 | 0.784267 |
| Jma000010022          | vs. | LOC109012425 | 0.471259 | 2.678511 | 0.175941 |
| Jma000027397          | vs. | LOC109012425 | 0.392332 | 0.863728 | 0.454231 |
| Jma000028526          | vs. | LOC109012490 | 0.396963 | 0.812479 | 0.488582 |
| Jma000010022          | vs. | LOC109012490 | 0.274119 | 0.499994 | 0.548244 |
| Jma000012097          | vs. | LOC109010810 | 0.375219 | 1.855395 | 0.202231 |
| Jma000010725          | vs. | LOC109014610 | 0.309044 | 0.476389 | 0.648721 |
| Jma000028562          | vs. | LOC108981029 | 0.026250 | 0.063764 | 0.411665 |
| Jma000027379          | vs. | LOC109014992 | 0.079230 | 0.101024 | 0.784267 |
| Jma000027379          | vs. | LOC108996119 | 0.313340 | 0.848647 | 0.369223 |
| Jma000010618          | vs. | LOC108980353 | 0.167197 | 0.277879 | 0.601688 |
| Jma000021159          | vs. | LOC118347739 | 1.556464 | 1.406164 | 1.106887 |

---

|              |     |              |          |          |          |
|--------------|-----|--------------|----------|----------|----------|
| Jma000010170 | vs. | LOC108988286 | -        | 2.527744 | -        |
| Jma000001165 | vs. | LOC108983353 | 0.008411 | 0.033246 | 0.252984 |
| LOC10901082  |     |              |          |          |          |
| 3            | vs. | LOC108997248 | 0.254942 | 0.727140 | 0.350609 |
| LOC10899611  |     |              |          |          |          |
| 9            | vs. | LOC109014992 | 0.269329 | 0.736894 | 0.365492 |
| LOC10901242  |     |              |          |          |          |
| 5            | vs. | LOC108987648 | 0.435963 | 2.479207 | 0.175848 |
| LOC10898801  |     |              |          |          |          |
| 7            | vs. | LOC108988017 | 0.000000 | 0.000000 | -        |
| LOC10901242  |     |              |          |          |          |
| 5            | vs. | LOC109012490 | 0.443470 | 3.244335 | 0.136690 |
| LOC10898764  |     |              |          |          |          |
| 8            | vs. | LOC109012490 | 0.169246 | 0.483389 | 0.350123 |
| LOC10901067  |     |              |          |          |          |
| 7            | vs. | LOC109012490 | 2.830937 | 3.088226 | 0.916687 |
| LOC10898801  |     |              |          |          |          |
| 7            | vs. | LOC108987648 | -        | 4.008405 | -        |
| LOC10901242  | vs. | LOC108987648 | 0.435963 | 2.479207 | 0.175848 |

---

---

5

LOC10898764

vs. LOC109012490 0.169246 0.483389 0.350123

8

Jma000028608

vs. Jma000012097 0.357288 1.902357 0.187813

Jma0000001165

vs. Jma000024408 0.324248 2.451943 0.132241

---
